# Supplementary material
Source: Springer Nature journal article supplement (https://www.springermedizin.de/resource/supplementary/12990_2009_231_MOESM2_ESM.pdf/9612846)

**A**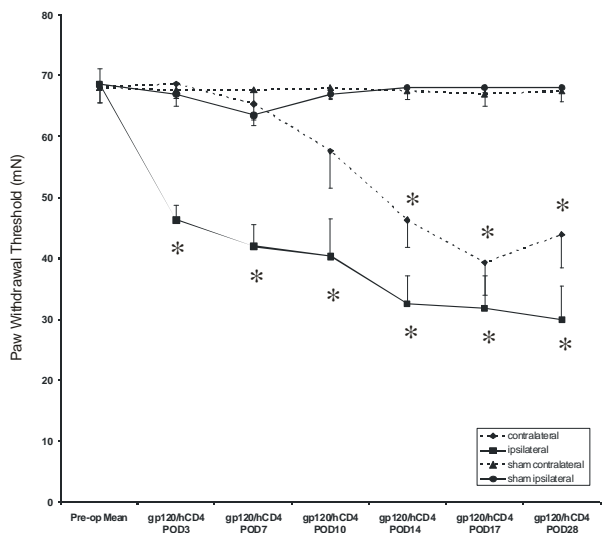**B**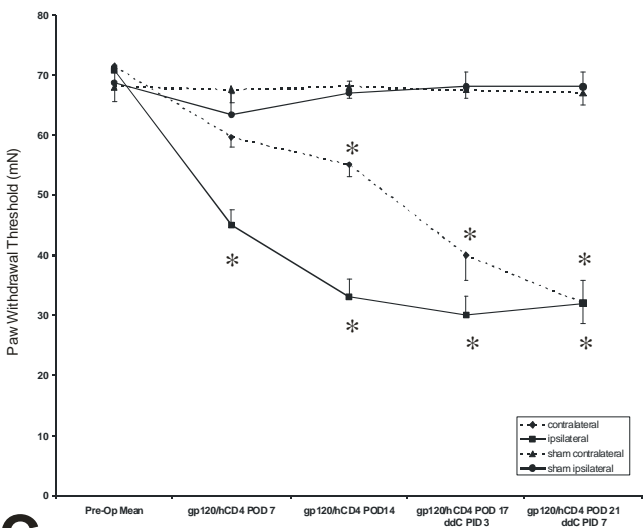**C**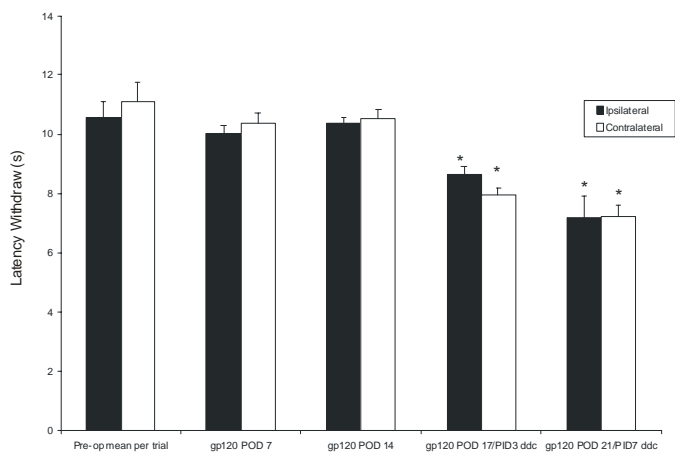

Supplement: MOESM2 [file 9612846]
